# Supplementary material for: Shape-memory polymer nanocomposites with a 3D conductive network for bidirectional actuation and locomotion application
Source: Royal Society of Chemistry journal article supplement (doi:10.1039/c6nr06515e), 2016-01-01
Supplement: c6nr06515e6.pdf [file c6nr06515e6.pdf]

## Supplementary Information

### Shape-Memory Polymer Nanocomposites with a 3D Conductive Network for Bidirectional Actuation and Locomotion Application

Qingyu Peng<sup>1#</sup>, Hongqiu Wei<sup>1#</sup>, Yuyang Qin<sup>1</sup>, Zaishan Lin<sup>1</sup>, Xu Zhao<sup>1</sup>, Fan Xu<sup>1</sup>, Jinsong Leng<sup>1\*</sup>, Xiaodong He<sup>1\*</sup>, Anyuan Cao<sup>2\*</sup> and Yibin Li<sup>1\*</sup>.

<sup>1</sup> National Key Laboratory of Science and Technology on Advanced Composites in Special Environments, Center for Composite Materials and Structures, Harbin Institute of Technology, Harbin 150080, P. R. China

<sup>2</sup> Department of Materials Science and Engineering, College of Engineering, Peking University, Beijing 100871, P. R. China

\*Corresponding authors. Email: [liyibin@hit.edu.cn](mailto:liyibin@hit.edu.cn), [hexd@hit.edu.cn](mailto:hexd@hit.edu.cn), [lengjs@hit.edu.cn](mailto:lengjs@hit.edu.cn), [anyuan@pku.edu.cn](mailto:anyuan@pku.edu.cn).

<sup>#</sup>These authors contributed equally to this work.

#### **Supplementary Information:**

**Figure S1.** Three shape memory cycles of Pure SMP.

**Figure S2.** The loss factor vs temperature curves for pure SMP and CNT sponge-SMP composite.

**Figure S3.** Photos of inchworm-type robot moving process when the cycle time is 40s.

**Movie 1** CNT sponge-SMP composite shape recovery process from “n” like shape to flat shape under applied 17V DC.

**Movie 2** CNT sponge-SMP composite shape recovery process from flat shape to “u”-like shape under applied 17V DC.

**Movie 3** CNT sponge-SMP composite bidirectional shape memory recovery process under applied 8V DC and 2V DC, play speed  $\times 100$ .

**Movie 4** The moving process of inchworm-type robots when cycle time is 120s, play speed  $\times 100$ .

**Movie 5** The moving process of inchworm-type robots when cycle time is 40s, play speed  $\times 100$ .

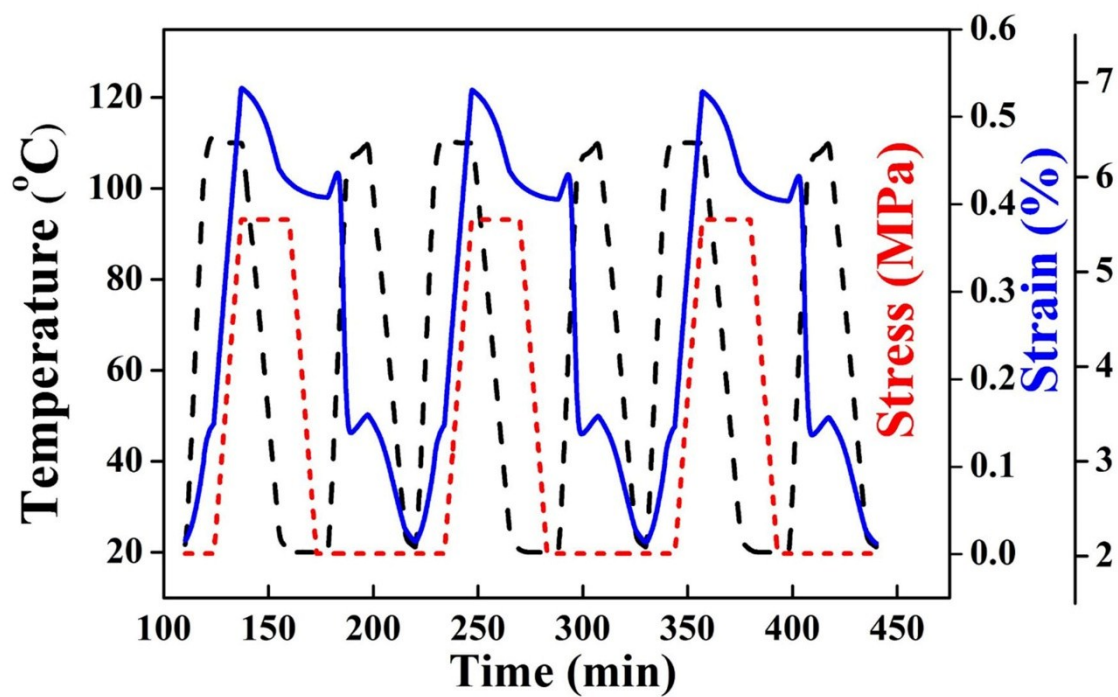

**Figure S1.** Three shape memory cycles of pure SMP.

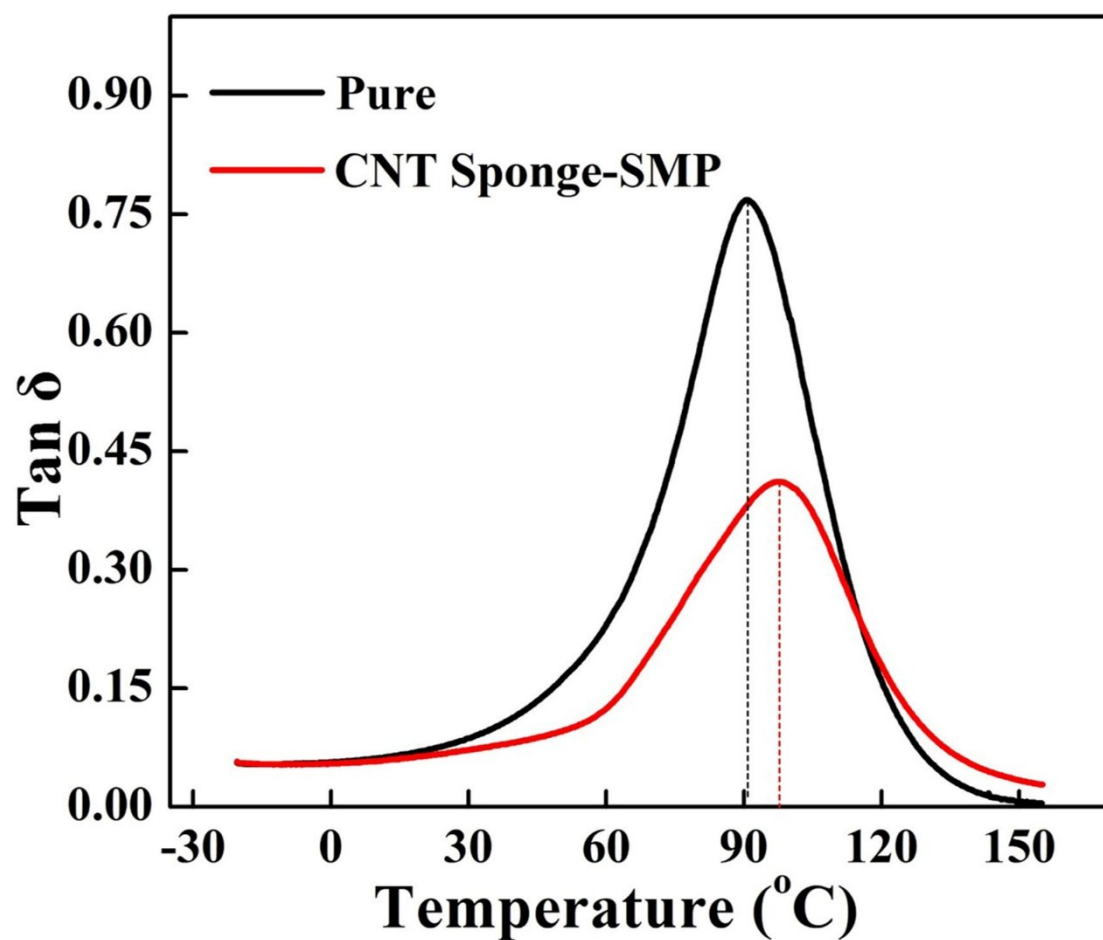

**Figure S2.** Loss factor vs. temperature curves for pure SMP and for the CNT sponge-SMP composite.

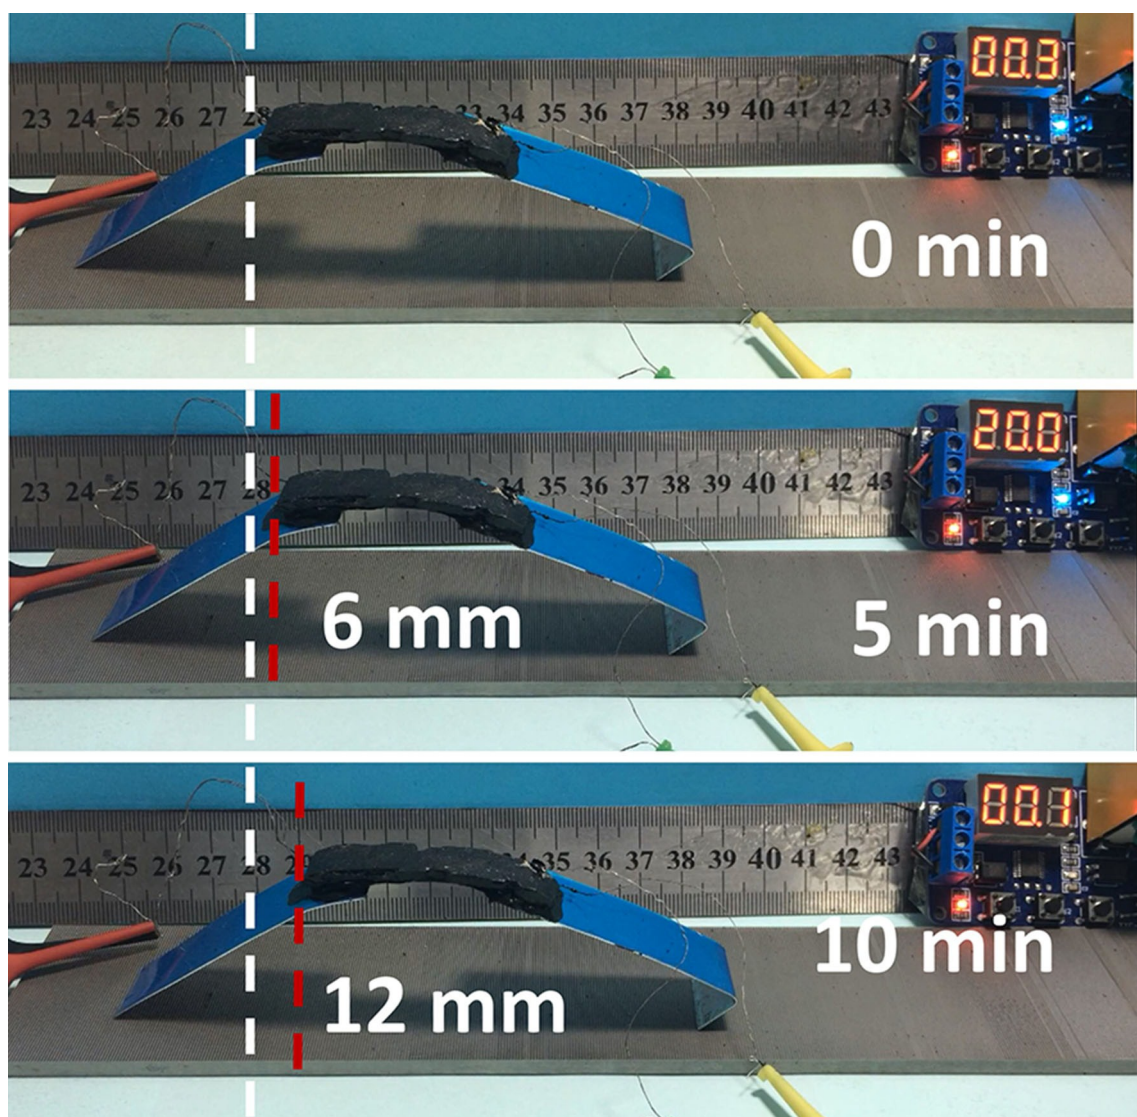

**Figure S3.** Photos of inchworm-type robot movement for a cycle time of 40 s.
